# Supplementary material
Source: PubMed Central journal article supplement (PMC4402121)
Supplement: NIHMS650981-supplement-b.pdf [file NIHMS650981-supplement-b.pdf]

| Gene Symbol | Fold (MCF-7-TNR/MCF-7) | p-value         | FDR             |
|-------------|------------------------|-----------------|-----------------|
| CCND2       | 35.8484993             | 1.66E-08        | 0.000002        |
| CDKN2A      | 10.34150028            | 9.01E-08        | 0.000004        |
| SESN3       | 8.385530472            | 3.01E-08        | 0.000002        |
| PMAIP1      | 5.159530163            | 1.26E-07        | 0.000006        |
| CDK6        | 4.886919975            | 3.42E-07        | 0.000010        |
| ATM         | 3.212480068            | 1.69E-06        | 0.000029        |
| CASP3       | 2.77263999             | 1.34E-06        | 0.000025        |
| RPRM        | 2.753829956            | 8.55E-07        | 0.000019        |
| CCNG1       | 2.536410093            | 4.59E-06        | 0.000060        |
| SESN1       | 2.364530087            | 3.03E-06        | 0.000045        |
| APAF1       | 2.354249954            | 5.01E-08        | 0.000003        |
| GADD45G     | 0.423877982            | 7.29E-06        | 0.000084        |
| CDKN1A      | 0.41262798             | 2.16E-07        | 0.000008        |
| PPM1D       | 0.315864996            | 2.23E-09        | 0.000001        |
| TP53I3      | 0.296019991            | 1.51E-07        | 0.000006        |
| CASP8       | 0.230773996            | 1.05E-06        | 0.000021        |
| CCND1       | 0.184722992            | 2.23E-08        | 0.000002        |
| <b>SFN</b>  | <b>0.094577499</b>     | <b>3.64E-07</b> | <b>0.000011</b> |
| THBS1       | 0.0186942              | 4.75E-11        | 0.000000        |

Supplementary Materials Table 2. Differential expression of the KEGG p53 Signaling Pathway genes in the gene expression arrays of MCF-7 and MCF-7-TNR cells (initially reported in Antoon JW, et al. Altered death receptor signaling promotes epithelial-to-mesenchymal transition and acquired chemoresistance. *Sci Rep.* 2012;2:539. PubMed PMID: 22844580).
