# Supplementary material
Source: PubMed Central journal article supplement (PMC4402121)
Supplement: NIHMS650981-supplement-c.pdf [file NIHMS650981-supplement-c.pdf]

| Gene Symbol | Fold (MCF-7-TNR/MCF-7) | p-value         | FDR             |
|-------------|------------------------|-----------------|-----------------|
| CCND2       | 35.8484993             | 1.66E-08        | 0.000002        |
| CDKN2A      | 10.34150028            | 9.01E-08        | 0.000004        |
| CDK6        | 4.886919975            | 3.42E-07        | 0.000010        |
| SKP2        | 4.507430077            | 7.15E-10        | 0.000000        |
| CDC7        | 4.18708992             | 1.03E-06        | 0.000021        |
| CDKN2C      | 3.632980108            | 4.97E-08        | 0.000003        |
| STAG2       | 3.596580029            | 9.21E-07        | 0.000020        |
| ATM         | 3.212480068            | 1.69E-06        | 0.000029        |
| CDC25C      | 3.00906992             | 3.31E-07        | 0.000010        |
| CDC14B      | 2.946460009            | 9.84E-07        | 0.000021        |
| CDC25A      | 2.799109936            | 4.30E-08        | 0.000003        |
| TTK         | 2.667740107            | 3.70E-05        | 0.000279        |
| CDC23       | 2.456190109            | 1.76E-04        | 0.000946        |
| CCNH        | 2.389430046            | 2.44E-06        | 0.000038        |
| MAD2L1      | 2.322849989            | 1.17E-05        | 0.000117        |
| TFDP2       | 2.282330036            | 2.36E-06        | 0.000038        |
| SMAD2       | 2.211519957            | 5.99E-06        | 0.000072        |
| PTTG1       | 2.154570103            | 2.98E-06        | 0.000044        |
| SMAD4       | 2.140330076            | 3.96E-08        | 0.000003        |
| CDC25B      | 0.491029987            | 7.50E-04        | 0.003120        |
| MYC         | 0.468197004            | 1.41E-06        | 0.000026        |
| GADD45G     | 0.423877982            | 7.29E-06        | 0.000084        |
| CDKN1A      | 0.41262798             | 2.16E-07        | 0.000008        |
| SMAD3       | 0.281467009            | 5.73E-07        | 0.000015        |
| CCND1       | 0.184722992            | 2.23E-08        | 0.000002        |
| TGFB2       | 0.179912003            | 4.89E-08        | 0.000003        |
| TGFB1       | 0.178087002            | 1.45E-06        | 0.000026        |
| <b>SFN</b>  | <b>0.094577499</b>     | <b>3.64E-07</b> | <b>0.000011</b> |

Supplementary Materials Table 3. Differential expression of the KEGG Cell Cycle Pathway genes in the gene expression arrays of MCF-7 and MCF-7-TNR cells (initially reported in Antoon JW, et al. Altered death receptor signaling promotes epithelial-to-mesenchymal transition and acquired chemoresistance. Sci Rep. 2012;2:539. PubMed PMID: 22844580).
