# Supplementary material
Source: PubMed Central journal article supplement (PMC4402121)
Supplement: NIHMS650981-supplement-d.pdf [file NIHMS650981-supplement-d.pdf]

| Name                                             | Size       | NES               | NOM p-val   | FDR q-val   |
|--------------------------------------------------|------------|-------------------|-------------|-------------|
| CHARAFE_BREAST_CANCER_LUMINAL_VS_MESENCHYMAL_UP  | 210        | -2.6877472        | 0           | 0           |
| GOZGIT_ESR1_TARGETS_DN                           | 320        | -2.5058138        | 0           | 0           |
| LIM_MAMMARY_STEM_CELL_DN                         | 128        | -2.4243438        | 0           | 0           |
| COLDREN_GEFITINIB_RESISTANCE_DN                  | 114        | -2.412589         | 0           | 0           |
| MCBRYAN_PUBERTAL_BREAST_4_5WK_UP                 | 108        | -2.3623729        | 0           | 0           |
| SMID_BREAST_CANCER_BASAL_DN                      | 232        | -2.3525863        | 0           | 0           |
| CREIGHTON_ENDOCRINE_THERAPY_RESISTANCE_1         | 166        | -2.2972343        | 0           | 0           |
| <b>CHARAFE_BREAST_CANCER_LUMINAL_VS_BASAL_UP</b> | <b>119</b> | <b>-2.2937005</b> | <b>0</b>    | <b>0</b>    |
| ONDER_CDH1_TARGETS_2_DN                          | 208        | -2.2725217        | 0           | 9.15E-05    |
| JOHNSTONE_PARVB_TARGETS_3_UP                     | 153        | -2.264569         | 0           | 8.24E-05    |
| WU_CELL_MIGRATION                                | 100        | -2.17246          | 0           | 2.29E-04    |
| JAEGER_METASTASIS_DN                             | 107        | -2.1406536        | 0           | 2.79E-04    |
| SWEET_LUNG_CANCER_KRAS_UP                        | 121        | -2.049731         | 0           | 0.001196145 |
| CREIGHTON_ENDOCRINE_THERAPY_RESISTANCE_4         | 104        | -1.9869702        | 0.001968504 | 0.00253891  |
| DELYS_THYROID_CANCER_UP                          | 145        | -1.8365674        | 0.001949318 | 0.016243933 |
| CREIGHTON_ENDOCRINE_THERAPY_RESISTANCE_5         | 154        | -1.7891937        | 0.001908397 | 0.02470445  |
| LEI_MYB_TARGETS                                  | 106        | -1.7160335        | 0.017509727 | 0.04557685  |
| SCHAEFFER_PROSTATE_DEVELOPMENT_6HR_DN            | 100        | -1.7016716        | 0.017077798 | 0.047863774 |
| PEDERSEN_METASTASIS_BY_ERBB2_ISOFORM_7           | 143        | -1.6785495        | 0.005586592 | 0.054197457 |
| HAN_SATB1_TARGETS_DN                             | 132        | -1.6709856        | 0.024761904 | 0.054889996 |
| HAN_SATB1_TARGETS_UP                             | 124        | -1.6657716        | 0.003891051 | 0.054233316 |
| SCHAEFFER_PROSTATE_DEVELOPMENT_48HR_UP           | 161        | -1.6566508        | 0.009727626 | 0.056134533 |
| NUYTEN_NIPP1_TARGETS_DN                          | 217        | -1.6416765        | 0.001831502 | 0.060631115 |
| FARMER_BREAST_CANCER_APOCRINE_VS_LUMINAL         | 105        | -1.6390626        | 0.019193858 | 0.059284057 |
| MEISSNER_NPC_HCP_WITH_H3_UNMETHYLATED            | 107        | -1.627727         | 0.026465029 | 0.0621942   |
| FARMER_BREAST_CANCER_BASAL_VS_LULMINAL           | 138        | -1.6017549        | 0.011764706 | 0.073144265 |
| MEISSNER_NPC_HCP_WITH_H3K4ME2                    | 110        | -1.5669643        | 0.045028143 | 0.091240816 |
| BOQUEST_STEM_CELL_CULTURED_VS_FRESH_UP           | 134        | -1.5455319        | 0.036053132 | 0.103049606 |
| DUTERTRE ESTRADIOL_RESPONSE_24HR_DN              | 202        | -1.5409155        | 0.019963702 | 0.10284284  |

|                                          |     |            |             |            |
|------------------------------------------|-----|------------|-------------|------------|
| BASAKI_YBX1_TARGETS_DN                   | 122 | -1.5195823 | 0.058708414 | 0.11505124 |
| BRUINS_UVC_RESPONSE_VIA_TP53_GROUP_B     | 134 | -1.4670229 | 0.040665433 | 0.15588571 |
| LEE_BMP2_TARGETS_UP                      | 214 | -1.4445255 | 0.055028465 | 0.17212844 |
| DODD_NASOPHARYNGEAL_CARCINOMA_UP         | 371 | -1.4350446 | 0.020754717 | 0.17613536 |
| VECCHI_GASTRIC_CANCER_EARLY_UP           | 107 | -1.3976314 | 0.12037037  | 0.20976558 |
| YOSHIMURA_MAPK8_TARGETS_UP               | 200 | -1.3872918 | 0.067567565 | 0.21526442 |
| MASSARWEH_TAMOXIFEN_RESISTANCE_UP        | 186 | -1.3847188 | 0.06923077  | 0.21202467 |
| ZWANG_CLASS_1_TRANSIENTLY_INDUCED_BY_EGF | 135 | -1.3780655 | 0.10754717  | 0.21410908 |

Supplementary Materials Table 4. The negatively enriched GSEA gene sets in the gene expression arrays of MCF-7 and MCF-7-TNR cells (initially reported in Antoon JW, et al. Altered death receptor signaling promotes epithelial-to-mesenchymal transition and acquired chemoresistance. *Sci Rep.* 2012;2:539. PubMed PMID: 22844580). FDR cutoff was set at 25% as recommended by GSEA's user guide.
