# Supplementary material
Source: PubMed Central journal article supplement (PMC4402121)
Supplement: NIHMS650981-supplement-e.pdf [file NIHMS650981-supplement-e.pdf]

| Name                                                 | Size       | NES              | NOM p-val          | FDR q-val          |
|------------------------------------------------------|------------|------------------|--------------------|--------------------|
| CHARAFE_BREAST_CANCER_LUMINAL_VS_MESENCHYMAL_DN      | 171        | 2.4994824        | 0                  | 0                  |
| SCHUETZ_BREAST_CANCER_DUCTAL_INVASIVE_UP             | 113        | 2.3060617        | 0                  | 6.19E-04           |
| KIM_BIPOLAR_DISORDER_OLIGODENDROCYTE_DENSITY_CORR_UP | 111        | 2.2292998        | 0                  | 0.004254058        |
| GOBERT_OLIGODENDROCYTE_DIFFERENTIATION_UP            | 138        | 2.1291723        | 0                  | 0.018029978        |
| KIM_ALL_DISORDERS_OLIGODENDROCYTE_NUMBER_CORR_UP     | 117        | 2.1263108        | 0                  | 0.014680453        |
| <b>CHARAFE_BREAST_CANCER_LUMINAL_VS_BASAL_DN</b>     | <b>155</b> | <b>2.0945652</b> | <b>0</b>           | <b>0.020007273</b> |
| LIM_MAMMARY_STEM_CELL_UP                             | 143        | 2.0699186        | 0                  | 0.024625184        |
| MARTENS_TRETINOIN_RESPONSE_DN                        | 101        | 2.0469184        | 0.004166667        | 0.027763413        |
| SMID_BREAST_CANCER_BASAL_UP                          | 186        | 1.9959226        | 0                  | 0.04519352         |
| VECCHI_GASTRIC_CANCER_EARLY_DN                       | 103        | 1.95738          | 0.02016129         | 0.06096862         |
| PUJANA_CHEK2_PCC_NETWORK                             | 131        | 1.8998824        | 0.013215859        | 0.09522923         |
| MATSUDA_NATURAL_KILLER_DIFFERENTIATION               | 119        | 1.815515         | 0.029598309        | 0.16583145         |
| SMID_BREAST_CANCER_LUMINAL_B_DN                      | 155        | 1.7988518        | 0.019607844        | 0.17174272         |
| DURAND_STROMA_MAX_UP                                 | 111        | 1.7765079        | 0.031982943        | 0.18249582         |
| LIU_PROSTATE_CANCER_DN                               | 163        | 1.7622806        | 0.019438446        | 0.18519607         |
| JAATINEN_HEMATOPOIETIC_STEM_CELL_UP                  | 108        | 1.7284185        | 0.044210527        | 0.20740241         |
| PUJANA_BRCA1_PCC_NETWORK                             | 255        | 1.7199526        | 0.010504202        | 0.2049493          |
| FARMER_BREAST_CANCER_APOCRINE_VS_BASAL               | 113        | 1.7196383        | 0.049217           | 0.19388424         |
| BAELDE_DIABETIC_NEPHROPATHY_DN                       | 121        | 1.6978906        | 0.05111111         | 0.20527944         |
| BENPORATH_SUZ12_TARGETS                              | 237        | 1.6935513        | 0.01793722         | 0.19998081         |
| BENPORATH_EED_TARGETS                                | 253        | 1.6495397        | 0.013100437        | 0.23030736         |
| CASORELLI_ACUTE_PROMYELOCYTIC_LEUKEMIA_DN            | 147        | 1.6411072        | 0.058165547        | 0.22822633         |
| WONG_ADULT_TISSUE_STEM_MODULE                        | 221        | 1.6076744        | 0.019823788        | 0.24926339         |
| <b>BENPORATH_PRC2_TARGETS</b>                        | <b>145</b> | <b>1.6018872</b> | <b>0.067940556</b> | <b>0.24390605</b>  |
| MARTINEZ_RB1_AND_TP53_TARGETS_DN                     | 126        | 1.6016846        | 0.06382979         | 0.2342927          |
| DIAZ_CHRONIC_MEYLOGENOUS_LEUKEMIA_UP                 | 242        | 1.5980266        | 0.017429193        | 0.2292103          |
| MARTINEZ_TP53_TARGETS_DN                             | 128        | 1.5890613        | 0.06666667         | 0.22853562         |
| BENPORATH_ES_WITH_H3K27ME3                           | 244        | 1.5829636        | 0.028017242        | 0.22611737         |
| GRAESSMANN_APOPTOSIS_BY_SERUM_DEPRIVATION_UP         | 116        | 1.5649861        | 0.06036217         | 0.23218066         |

|                                                  |     |           |             |            |
|--------------------------------------------------|-----|-----------|-------------|------------|
| WAKABAYASHI_ADIPOGENESIS_PPARG_RXRA_BOUND_8D     | 159 | 1.5530957 | 0.08176101  | 0.23440523 |
| PUJANA_ATM_PCC_NETWORK                           | 235 | 1.5408263 | 0.0389016   | 0.23790386 |
| KIM_ALL_DISORDERS_CALB1_CORR_UP                  | 108 | 1.5398954 | 0.081932776 | 0.23094082 |
| FLECHNER_BIOPSY_KIDNEY_TRANSPLANT_OK_VS_DONOR_UP | 114 | 1.5276811 | 0.08510638  | 0.23330861 |
| DOUGLAS_BMI1_TARGETS_UP                          | 115 | 1.5263611 | 0.07484408  | 0.22758655 |
| ONKEN_UVEAL_MELANOMA_DN                          | 131 | 1.5201589 | 0.084474884 | 0.22577167 |
| MARTINEZ_RB1_TARGETS_DN                          | 122 | 1.4954373 | 0.08039216  | 0.23958743 |
| REN_ALVEOLAR_RHABDOMYOSARCOMA_DN                 | 117 | 1.4869964 | 0.07535642  | 0.2406419  |
| FOSTER_TOLERANT_MACROPHAGE_DN                    | 105 | 1.4847691 | 0.104477614 | 0.23573768 |
| RIGGI_EWING_SARCOMA_PROGENITOR_UP                | 126 | 1.4659555 | 0.099585064 | 0.2443301  |
| SCHAEFFER_PROSTATE_DEVELOPMENT_48HR_DN           | 107 | 1.4624575 | 0.119373776 | 0.24100202 |
| ENK_UV_RESPONSE_KERATINOCYTE_DN                  | 113 | 1.4546819 | 0.10229645  | 0.24133034 |
| MOHANKUMAR_TLX1_TARGETS_UP                       | 103 | 1.4494942 | 0.09756097  | 0.23952197 |
| HAMAI_APOPTOSIS_VIA_TRAIL_UP                     | 162 | 1.447156  | 0.084070794 | 0.236071   |

Supplementary Materials Table 5. The positively enriched GSEA gene sets in the gene expression arrays of MCF-7 and MCF-7-TNR cells (initially reported in Antoon JW, et al. Altered death receptor signaling promotes epithelial-to-mesenchymal transition and acquired chemoresistance. *Sci Rep.* 2012;2:539. PubMed PMID: 22844580). FDR cutoff was set at 25% as recommended by GSEA's user guide.
