# Supplementary material
Source: PubMed Central journal article supplement (PMC4402121)
Supplement: NIHMS650981-supplement-f.pdf [file NIHMS650981-supplement-f.pdf]

| Gene Symbol | Fold (MCF-7-TNR/MCF-7) | p-value  | FDR      |
|-------------|------------------------|----------|----------|
| DACH1       | 13.80519962            | 1.33E-09 | 0.000000 |
| ZNF704      | 4.548510075            | 8.89E-06 | 0.000096 |
| BCOR        | 3.506079912            | 5.72E-06 | 0.000070 |
| CHN2        | 2.955169916            | 7.09E-06 | 0.000082 |
| PLCXD1      | 2.580329895            | 1.48E-05 | 0.000139 |
| JHDM1D      | 2.355550051            | 4.20E-06 | 0.000056 |
| GART        | 2.302160025            | 1.50E-08 | 0.000002 |
| TBX3        | 2.194560051            | 6.16E-05 | 0.000412 |
| HIP1R       | 0.499474006            | 3.20E-05 | 0.000250 |
| DIP2C       | 0.498745972            | 5.12E-06 | 0.000065 |
| SEC16A      | 0.498679024            | 4.76E-06 | 0.000061 |
| DEGS2       | 0.492525001            | 9.38E-05 | 0.000573 |
| ABCA3       | 0.489898017            | 1.25E-04 | 0.000716 |
| THSD4       | 0.484971988            | 3.65E-05 | 0.000276 |
| CREB3L4     | 0.484729974            | 3.47E-04 | 0.001648 |
| ANKRD13D    | 0.467900023            | 9.31E-06 | 0.000099 |
| TNRC18      | 0.467468022            | 3.43E-05 | 0.000264 |
| SLC4A8      | 0.467339993            | 1.14E-05 | 0.000115 |
| SLC2A10     | 0.466500019            | 2.83E-05 | 0.000228 |
| GPD1L       | 0.465941004            | 3.94E-05 | 0.000293 |
| TSPAN13     | 0.461547993            | 5.72E-07 | 0.000014 |
| WFS1        | 0.460724997            | 7.45E-06 | 0.000085 |
| ABHD12      | 0.450643985            | 2.05E-08 | 0.000002 |
| TTC9        | 0.445107022            | 8.39E-05 | 0.000525 |
| RNF103      | 0.442841995            | 8.82E-06 | 0.000095 |
| MCCC2       | 0.440628               | 2.14E-05 | 0.000183 |
| SLC25A29    | 0.436483005            | 1.60E-05 | 0.000148 |
| CDC42SE1    | 0.434036016            | 1.34E-07 | 0.000006 |
| SYNGR2      | 0.433284006            | 2.20E-05 | 0.000188 |
| MEGF9       | 0.420888991            | 1.08E-05 | 0.000111 |
| PLEKHH1     | 0.419393997            | 5.49E-06 | 0.000068 |
| ZBTB42      | 0.415302007            | 1.44E-05 | 0.000137 |
| MAPT        | 0.404388015            | 8.28E-05 | 0.000520 |
| TBL1X       | 0.404236017            | 6.85E-05 | 0.000447 |
| CACNB3      | 0.404006016            | 2.67E-06 | 0.000041 |
| EVL         | 0.402266995            | 2.92E-05 | 0.000233 |
| RAB17       | 0.402209017            | 1.90E-06 | 0.000032 |
| RHBDF1      | 0.399373998            | 2.29E-05 | 0.000193 |
| RGL2        | 0.392000993            | 4.52E-06 | 0.000059 |
| C19orf46    | 0.385581014            | 1.00E-04 | 0.000604 |
| DAAM1       | 0.383771995            | 3.29E-07 | 0.000010 |

|          |             |          |          |
|----------|-------------|----------|----------|
| FAM46C   | 0.380144999 | 1.84E-06 | 0.000031 |
| TMEM184A | 0.376057001 | 4.80E-06 | 0.000062 |
| LARGE    | 0.368748986 | 1.36E-07 | 0.000006 |
| TRPS1    | 0.367605005 | 2.36E-06 | 0.000038 |
| TJP3     | 0.362393003 | 5.74E-06 | 0.000070 |
| TFF3     | 0.359891992 | 1.38E-05 | 0.000132 |
| ZMIZ1    | 0.354442005 | 3.03E-04 | 0.001476 |
| SLC24A3  | 0.34849301  | 1.22E-05 | 0.000121 |
| DOPEY2   | 0.344990008 | 3.18E-06 | 0.000046 |
| EPN3     | 0.344485001 | 2.62E-05 | 0.000214 |
| KIAA0182 | 0.335313008 | 3.99E-06 | 0.000054 |
| LFNG     | 0.331117988 | 8.44E-06 | 0.000093 |
| RND1     | 0.322527993 | 8.94E-07 | 0.000019 |
| LNX1     | 0.32007299  | 2.47E-05 | 0.000205 |
| KIAA1244 | 0.312920003 | 3.60E-06 | 0.000051 |
| TTC39A   | 0.307610009 | 7.99E-08 | 0.000004 |
| TC2N     | 0.307398991 | 5.38E-08 | 0.000003 |
| TSPAN15  | 0.305233998 | 1.01E-06 | 0.000021 |
| FLJ45983 | 0.303814999 | 1.32E-05 | 0.000128 |
| MGAT4A   | 0.296881995 | 5.81E-06 | 0.000071 |
| LONRF2   | 0.29672099  | 5.29E-06 | 0.000066 |
| EFR3B    | 0.294188006 | 7.97E-06 | 0.000089 |
| ICA1     | 0.292349006 | 4.74E-07 | 0.000013 |
| PCK2     | 0.291057992 | 8.62E-07 | 0.000019 |
| RAB3D    | 0.289283991 | 1.67E-07 | 0.000007 |
| ABHD11   | 0.280524003 | 2.38E-06 | 0.000038 |
| ARRB1    | 0.271953005 | 9.02E-07 | 0.000020 |
| TOB1     | 0.270613998 | 6.21E-08 | 0.000004 |
| SLC37A1  | 0.258955993 | 3.90E-07 | 0.000011 |
| KIAA0040 | 0.248478991 | 1.67E-07 | 0.000007 |
| C4orf19  | 0.241248003 | 1.10E-04 | 0.000651 |
| GOLT1A   | 0.231737005 | 1.84E-06 | 0.000031 |
| MYO5B    | 0.228716011 | 4.48E-07 | 0.000012 |
| TMEM229B | 0.225943988 | 8.59E-07 | 0.000019 |
| CXXC5    | 0.222677006 | 8.53E-09 | 0.000001 |
| ATP2C2   | 0.220726006 | 3.12E-08 | 0.000002 |
| C17orf28 | 0.218218998 | 1.06E-06 | 0.000022 |
| PCP4     | 0.21357299  | 4.71E-07 | 0.000013 |
| SCUBE2   | 0.212387007 | 2.50E-05 | 0.000207 |
| SYCP2    | 0.203022994 | 2.61E-06 | 0.000040 |
| SHANK2   | 0.202456995 | 5.04E-07 | 0.000013 |
| CACNA1D  | 0.201434993 | 8.56E-08 | 0.000004 |

|           |             |          |          |
|-----------|-------------|----------|----------|
| TBC1D30   | 0.196497004 | 8.25E-07 | 0.000019 |
| CTNND2    | 0.188282005 | 1.15E-08 | 0.000001 |
| LLGL2     | 0.186552007 | 6.15E-07 | 0.000015 |
| C14orf132 | 0.184778997 | 1.23E-07 | 0.000005 |
| CCND1     | 0.184722992 | 2.23E-08 | 0.000002 |
| AR        | 0.182605004 | 1.67E-06 | 0.000029 |
| SLC9A3R1  | 0.182576992 | 3.45E-07 | 0.000010 |
| EMP2      | 0.181641994 | 1.74E-07 | 0.000007 |
| ERBB3     | 0.165689994 | 2.10E-07 | 0.000008 |
| XBP1      | 0.161586002 | 2.10E-08 | 0.000002 |
| SLC16A6   | 0.156590005 | 3.69E-06 | 0.000051 |
| PPP2R2C   | 0.140502003 | 1.98E-07 | 0.000007 |
| GALNT6    | 0.139201997 | 8.05E-09 | 0.000001 |
| ESRP2     | 0.132814998 | 7.07E-06 | 0.000082 |
| MYB       | 0.131537998 | 1.40E-07 | 0.000006 |
| CACNG4    | 0.125765    | 8.04E-09 | 0.000001 |
| FOXA1     | 0.118912997 | 1.84E-08 | 0.000002 |
| CYB561    | 0.108445004 | 4.04E-05 | 0.000298 |
| STARD10   | 0.094134301 | 1.05E-08 | 0.000001 |
| PGR       | 0.088558901 | 4.94E-08 | 0.000003 |
| BCAS1     | 0.0815724   | 1.59E-08 | 0.000002 |
| SPDEF     | 0.081436401 | 2.03E-08 | 0.000002 |
| CA12      | 0.074438199 | 2.29E-09 | 0.000001 |
| DNAJA4    | 0.072983298 | 8.62E-10 | 0.000000 |
| ATP8B1    | 0.066638899 | 3.13E-04 | 0.001515 |
| MLPH      | 0.058421301 | 1.89E-08 | 0.000002 |
| PREX1     | 0.0539946   | 1.09E-09 | 0.000000 |
| SIDT1     | 0.0506596   | 4.67E-09 | 0.000001 |
| ANXA9     | 0.048807598 | 3.99E-08 | 0.000003 |
| GATA3     | 0.0387425   | 1.11E-08 | 0.000001 |
| ESR1      | 0.036726399 | 1.44E-08 | 0.000002 |
| PRLR      | 0.0302864   | 3.75E-08 | 0.000002 |
| KIAA1324  | 0.023831099 | 1.05E-08 | 0.000001 |
| AGR2      | 0.015072901 | 8.72E-10 | 0.000000 |
| KRT19     | 0.0126983   | 1.87E-10 | 0.000000 |
| TFF1      | 0.00524694  | 4.51E-09 | 0.000001 |

Supplementary Materials Table 6. Differential expression of the LUMINAL\_VS\_BASAL\_UP genes in the gene expression arrays of MCF-7 and MCF-7-TNR cells (initially reported in Antoon JW, et al. Altered death receptor signaling promotes epithelial-to-mesenchymal transition and acquired chemoresistance. Sci Rep. 2012;2:539. PubMed PMID: 22844580).
