# Supplementary material
Source: PubMed Central journal article supplement (PMC4402121)
Supplement: NIHMS650981-supplement-g.pdf [file NIHMS650981-supplement-g.pdf]

| Gene Symbol | Fold (MCF-7-TNR/MCF-7) | p-value  | FDR      |
|-------------|------------------------|----------|----------|
| PLS3        | 236.0590057            | 1.46E-09 | 0.000000 |
| AGPS        | 119.0240021            | 5.27E-10 | 0.000000 |
| AKT3        | 69.20179749            | 7.96E-11 | 0.000000 |
| SLC6A15     | 57.65390015            | 4.77E-09 | 0.000001 |
| AKR1B1      | 46.65840149            | 6.09E-11 | 0.000000 |
| GSTP1       | 40.60359955            | 6.05E-10 | 0.000000 |
| CCDC88A     | 36.18149948            | 2.07E-11 | 0.000000 |
| BTG3        | 32.87469864            | 4.54E-10 | 0.000000 |
| FSTL1       | 30.64819908            | 6.56E-09 | 0.000001 |
| TLE4        | 27.69210052            | 1.19E-07 | 0.000005 |
| GNAI1       | 27.64080048            | 7.71E-09 | 0.000001 |
| IGF2BP3     | 27.37949944            | 7.18E-06 | 0.000083 |
| DSC3        | 24.65060043            | 7.79E-09 | 0.000001 |
| SLC1A3      | 21.44039917            | 1.67E-07 | 0.000007 |
| WBP5        | 21.31290054            | 2.72E-07 | 0.000009 |
| PLA2G4A     | 21.23649979            | 2.10E-07 | 0.000008 |
| TNFRSF10D   | 17.58139992            | 9.19E-10 | 0.000000 |
| MSN         | 16.35659981            | 2.04E-07 | 0.000007 |
| HOXA5       | 15.22939968            | 1.47E-08 | 0.000002 |
| ZDHHC2      | 15.04520035            | 1.21E-09 | 0.000000 |
| FHL1        | 14.95880032            | 1.44E-08 | 0.000002 |
| OSBPL3      | 12.34799957            | 2.42E-08 | 0.000002 |
| GJC1        | 11.44499969            | 3.91E-09 | 0.000001 |
| ADD3        | 11.24260044            | 3.83E-08 | 0.000003 |
| SNAI2       | 10.98960018            | 1.93E-05 | 0.000170 |
| BTN3A2      | 10.9616003             | 2.20E-07 | 0.000008 |
| LOX         | 10.8671999             | 5.33E-08 | 0.000003 |
| WLS         | 10.65030003            | 4.19E-07 | 0.000012 |
| CALD1       | 9.644189835            | 5.01E-06 | 0.000064 |
| GPM6B       | 8.263360023            | 1.23E-06 | 0.000024 |
| HSD17B11    | 8.254130363            | 1.79E-07 | 0.000007 |
| PDGFC       | 8.134400368            | 1.24E-07 | 0.000005 |
| BICC1       | 8.002220154            | 9.04E-07 | 0.000020 |
| ATP10D      | 6.913630009            | 5.40E-08 | 0.000003 |
| B3GNT5      | 6.87887001             | 7.62E-08 | 0.000004 |
| CYBRD1      | 6.55892992             | 5.71E-06 | 0.000070 |
| DSE         | 6.454760075            | 1.66E-07 | 0.000007 |
| ANTXR1      | 6.339600086            | 1.15E-07 | 0.000005 |
| LYN         | 5.993350029            | 2.91E-08 | 0.000002 |
| IGF2BP2     | 5.987559795            | 2.55E-07 | 0.000008 |
| PPP1R14C    | 5.564330101            | 8.50E-07 | 0.000019 |

|          |             |          |          |
|----------|-------------|----------|----------|
| GABRE    | 5.522250175 | 2.37E-06 | 0.000038 |
| HOXA1    | 5.359449863 | 9.90E-07 | 0.000021 |
| HMGA2    | 5.128240108 | 1.96E-05 | 0.000172 |
| RNF145   | 5.116640091 | 1.79E-07 | 0.000007 |
| GPX8     | 5.042540073 | 1.13E-06 | 0.000023 |
| CDK6     | 4.886919975 | 3.42E-07 | 0.000010 |
| CFL2     | 4.801209927 | 8.89E-10 | 0.000000 |
| MAP7D3   | 4.569459915 | 1.04E-06 | 0.000021 |
| VSNL1    | 4.436180115 | 2.10E-06 | 0.000035 |
| EMP3     | 4.359980106 | 6.73E-06 | 0.000079 |
| PLAT     | 4.32434988  | 2.21E-06 | 0.000036 |
| HOXA3    | 4.294879913 | 5.91E-05 | 0.000398 |
| GNAL     | 4.205550194 | 5.49E-06 | 0.000068 |
| RBMS3    | 4.188210011 | 4.89E-06 | 0.000063 |
| PRSS12   | 4.048989773 | 2.19E-06 | 0.000036 |
| PTPRM    | 4.00248003  | 1.58E-06 | 0.000028 |
| CCDC28A  | 3.948299885 | 1.25E-06 | 0.000024 |
| ERAP2    | 3.836319923 | 1.99E-06 | 0.000033 |
| SCHIP1   | 3.753639936 | 4.88E-07 | 0.000013 |
| DNAJB4   | 3.738539934 | 2.36E-08 | 0.000002 |
| SNX7     | 3.72059989  | 9.21E-07 | 0.000020 |
| FXD5     | 3.605730057 | 3.33E-06 | 0.000048 |
| SPRY2    | 3.52402997  | 3.56E-05 | 0.000270 |
| FAM171A1 | 3.490829945 | 6.04E-07 | 0.000015 |
| RGL1     | 3.301280022 | 4.56E-07 | 0.000012 |
| PM20D2   | 3.19656992  | 2.36E-08 | 0.000002 |
| PSAT1    | 3.102200031 | 7.36E-07 | 0.000017 |
| SLC9A6   | 3.099009991 | 6.97E-08 | 0.000004 |
| ZC3H12C  | 3.077950001 | 7.49E-06 | 0.000085 |
| SERPINE2 | 3.035559893 | 1.03E-06 | 0.000021 |
| FAM101B  | 3.022819996 | 7.92E-06 | 0.000089 |
| SLC16A1  | 2.844690084 | 2.10E-07 | 0.000008 |
| ABCD3    | 2.768100023 | 9.77E-08 | 0.000005 |
| GNG12    | 2.749370098 | 2.65E-06 | 0.000041 |
| SKAP2    | 2.716559887 | 1.30E-06 | 0.000025 |
| MET      | 2.703639984 | 2.14E-07 | 0.000008 |
| DPYD     | 2.647310019 | 4.37E-06 | 0.000058 |
| CDC42EP3 | 2.638710022 | 6.49E-06 | 0.000077 |
| FGF2     | 2.587169886 | 1.07E-05 | 0.000110 |
| PKN2     | 2.5025599   | 2.26E-07 | 0.000008 |
| SRPX     | 2.491430044 | 3.95E-04 | 0.001835 |
| CTSC     | 2.469460011 | 9.15E-07 | 0.000020 |

|         |             |          |          |
|---------|-------------|----------|----------|
| GTF2B   | 2.46333003  | 5.31E-06 | 0.000066 |
| KIRREL  | 2.442810059 | 4.97E-06 | 0.000063 |
| PRKD3   | 2.425250053 | 9.72E-07 | 0.000021 |
| NDFIP2  | 2.35777998  | 9.21E-06 | 0.000098 |
| SRI     | 2.312200069 | 9.64E-06 | 0.000102 |
| GART    | 2.302160025 | 1.50E-08 | 0.000002 |
| INPP1   | 2.289319992 | 4.07E-06 | 0.000055 |
| CCDC82  | 2.257869959 | 4.80E-08 | 0.000003 |
| RBFOX2  | 2.177550077 | 2.20E-04 | 0.001136 |
| ITM2C   | 2.143650055 | 4.83E-06 | 0.000062 |
| TMED5   | 2.126280069 | 2.75E-06 | 0.000042 |
| FGFBP1  | 2.114969969 | 3.61E-07 | 0.000011 |
| COL4A2  | 2.103169918 | 4.12E-04 | 0.001902 |
| CCDC80  | 2.096960068 | 8.55E-05 | 0.000531 |
| FMNL2   | 2.095669985 | 4.92E-07 | 0.000013 |
| MFGE8   | 2.082149982 | 5.62E-06 | 0.000069 |
| COL4A1  | 2.064909935 | 2.73E-06 | 0.000041 |
| SOAT1   | 2.040560007 | 1.36E-04 | 0.000770 |
| ARNTL2  | 2.032330036 | 5.26E-06 | 0.000066 |
| MTMR2   | 2.001060009 | 4.94E-04 | 0.002212 |
| PSMB9   | 0.495726003 | 1.23E-04 | 0.000710 |
| CASP4   | 0.495186976 | 5.17E-06 | 0.000065 |
| CCNYL1  | 0.494637978 | 9.88E-05 | 0.000598 |
| LAMB3   | 0.494263995 | 3.87E-04 | 0.001804 |
| GPSM2   | 0.492356005 | 5.44E-05 | 0.000374 |
| CFLAR   | 0.490459018 | 1.25E-04 | 0.000716 |
| SVIL    | 0.489775023 | 3.18E-06 | 0.000046 |
| MT1H    | 0.486813973 | 1.23E-05 | 0.000121 |
| MT1F    | 0.473649001 | 2.36E-05 | 0.000198 |
| WDR1    | 0.462513995 | 3.71E-07 | 0.000011 |
| MYL12A  | 0.461819978 | 9.81E-06 | 0.000103 |
| TRIM29  | 0.456585005 | 3.61E-06 | 0.000051 |
| MT1G    | 0.437358011 | 4.04E-06 | 0.000055 |
| MYO1B   | 0.43477099  | 9.89E-07 | 0.000021 |
| AKR1B10 | 0.430812996 | 2.06E-04 | 0.001073 |
| SLPI    | 0.423434011 | 5.24E-05 | 0.000363 |
| IFIT3   | 0.417476983 | 3.46E-04 | 0.001647 |
| RALB    | 0.411229981 | 2.86E-05 | 0.000230 |
| FNDC3B  | 0.408380999 | 1.02E-06 | 0.000021 |
| CD58    | 0.395976999 | 2.45E-06 | 0.000038 |
| GBP1    | 0.394231997 | 3.07E-05 | 0.000242 |
| TAX1BP3 | 0.387285008 | 4.69E-06 | 0.000061 |

|         |             |          |          |
|---------|-------------|----------|----------|
| RBMS1   | 0.372347009 | 2.29E-04 | 0.001168 |
| GBP3    | 0.365452006 | 2.18E-06 | 0.000035 |
| TP63    | 0.359605002 | 1.34E-06 | 0.000025 |
| NRP1    | 0.331187012 | 1.76E-07 | 0.000007 |
| ANXA4   | 0.331159006 | 2.35E-07 | 0.000008 |
| FZD6    | 0.315218004 | 2.22E-07 | 0.000008 |
| IL18    | 0.311753998 | 1.67E-04 | 0.000907 |
| TMEM154 | 0.31130899  | 2.37E-06 | 0.000038 |
| SMAD3   | 0.281467009 | 5.73E-07 | 0.000015 |
| ACTN1   | 0.280910997 | 3.13E-06 | 0.000046 |
| SPATS2L | 0.276585004 | 3.40E-05 | 0.000261 |
| LAMC2   | 0.274641007 | 1.17E-06 | 0.000023 |
| MT2A    | 0.258655003 | 3.73E-06 | 0.000052 |
| TGFBI   | 0.252758995 | 1.10E-04 | 0.000649 |
| TGFA    | 0.233344998 | 6.78E-07 | 0.000016 |
| NAV2    | 0.221318999 | 2.82E-07 | 0.000009 |
| OSMR    | 0.164666006 | 7.54E-07 | 0.000017 |
| SP100   | 0.15441     | 3.05E-06 | 0.000045 |
| ITGA3   | 0.148790999 | 1.36E-08 | 0.000001 |
| AKR1C1  | 0.147877001 | 2.86E-06 | 0.000043 |
| ANXA3   | 0.141484002 | 3.45E-07 | 0.000010 |
| NMI     | 0.141331996 | 8.26E-06 | 0.000091 |
| PHLDA1  | 0.123365003 | 2.41E-07 | 0.000008 |
| CDH3    | 0.117519003 | 1.78E-08 | 0.000002 |
| CD44    | 0.115375    | 9.10E-07 | 0.000020 |
| SFN     | 0.094577499 | 3.64E-07 | 0.000011 |
| AKR1C3  | 0.0855852   | 6.60E-08 | 0.000004 |
| AIM1    | 0.054062197 | 2.82E-08 | 0.000002 |
| IFI27   | 0.0378918   | 1.48E-08 | 0.000002 |
| AKR1C2  | 0.0215412   | 2.34E-07 | 0.000008 |

Supplementary Materials Table 7. Differential expression of the LUMINAL\_VS\_BASAL\_DN genes in the gene expression arrays of MCF-7 and MCF-7-TNR cells (initially reported in Antoon JW, et al. Altered death receptor signaling promotes epithelial-to-mesenchymal transition and acquired chemoresistance. *Sci Rep.* 2012;2:539. PubMed PMID: 22844580).
