# Supplementary material
Source: PubMed Central journal article supplement (PMC4402121)
Supplement: NIHMS650981-supplement-h.pdf [file NIHMS650981-supplement-h.pdf]

| Gene Symbol | Fold (MCF-7-TNR/MCF-7) | p-value  | FDR      |
|-------------|------------------------|----------|----------|
| SLFN11      | 94.92479706            | 1.50E-12 | 0.000000 |
| SLIT2       | 90.53579712            | 8.88E-10 | 0.000000 |
| LRCH2       | 70.99120331            | 1.95E-10 | 0.000000 |
| NEFL        | 36.37450027            | 1.71E-09 | 0.000000 |
| HEY1        | 32.34989929            | 2.57E-12 | 0.000000 |
| INA         | 25.60989952            | 2.40E-08 | 0.000002 |
| DSC3        | 24.65060043            | 7.79E-09 | 0.000001 |
| HOXB6       | 23.78569984            | 1.27E-07 | 0.000006 |
| LGR5        | 21.84160042            | 8.19E-12 | 0.000000 |
| LPHN3       | 16.95389938            | 5.66E-10 | 0.000000 |
| FBN2        | 15.64280033            | 4.29E-07 | 0.000012 |
| DACH1       | 13.80519962            | 1.33E-09 | 0.000000 |
| HOXD13      | 11.5394001             | 5.79E-07 | 0.000015 |
| PRKG1       | 8.702110291            | 1.39E-07 | 0.000006 |
| ZEB2        | 8.444749832            | 1.11E-07 | 0.000005 |
| PAX6        | 8.436149597            | 4.34E-07 | 0.000012 |
| GUCY1A3     | 8.406590462            | 3.78E-08 | 0.000002 |
| GPM6B       | 8.263360023            | 1.23E-06 | 0.000024 |
| LAYN        | 7.514550209            | 4.44E-07 | 0.000012 |
| FGF9        | 7.271220207            | 6.27E-07 | 0.000015 |
| ITGA4       | 7.15007019             | 1.47E-08 | 0.000002 |
| EPHA5       | 7.035200119            | 7.04E-07 | 0.000017 |
| SLITRK3     | 7.00428009             | 1.49E-06 | 0.000027 |
| C4orf49     | 6.54776001             | 2.42E-07 | 0.000008 |
| FAM5C       | 6.325970173            | 1.83E-07 | 0.000007 |
| FLRT2       | 6.198999882            | 7.90E-06 | 0.000088 |
| HOXB3       | 6.141320229            | 3.26E-06 | 0.000047 |
| PAX3        | 6.102739811            | 8.79E-10 | 0.000000 |
| DPY19L2P2   | 6.011799812            | 1.63E-07 | 0.000007 |
| CDH7        | 5.984980106            | 1.74E-07 | 0.000007 |
| SLCO5A1     | 5.644279957            | 1.50E-07 | 0.000006 |
| ZNF503      | 5.499209881            | 7.70E-07 | 0.000018 |
| SPOCK3      | 5.379119873            | 7.15E-07 | 0.000017 |
| NCAM1       | 5.351309776            | 1.08E-06 | 0.000022 |
| LONRF3      | 5.339859962            | 1.84E-07 | 0.000007 |
| ISL1        | 5.258029938            | 8.57E-07 | 0.000019 |
| HOXB2       | 4.641620159            | 6.32E-07 | 0.000016 |
| HOXC6       | 4.637619972            | 2.94E-09 | 0.000001 |
| F2R         | 4.540239811            | 1.57E-06 | 0.000028 |
| MLLT3       | 4.469230175            | 2.91E-06 | 0.000043 |
| DOK6        | 4.344779968            | 2.52E-04 | 0.001264 |

|           |             |          |          |
|-----------|-------------|----------|----------|
| ELMOD1    | 4.109920025 | 3.39E-06 | 0.000048 |
| TLL1      | 4.099110126 | 4.59E-06 | 0.000060 |
| PCDH17    | 4.054830074 | 1.86E-06 | 0.000032 |
| NOL4      | 4.039509773 | 1.11E-07 | 0.000005 |
| UNC5C     | 3.964829922 | 5.99E-08 | 0.000003 |
| LRFN5     | 3.829540014 | 1.48E-06 | 0.000027 |
| COLEC12   | 3.811870098 | 7.24E-07 | 0.000017 |
| GHR       | 3.715790033 | 1.58E-07 | 0.000006 |
| CDKN2C    | 3.632980108 | 4.97E-08 | 0.000003 |
| RPS6KA6   | 3.632110119 | 1.95E-06 | 0.000033 |
| NEFM      | 3.34968996  | 1.42E-06 | 0.000026 |
| DCLK2     | 3.337519884 | 1.41E-06 | 0.000026 |
| RNF128    | 3.297610044 | 4.28E-07 | 0.000012 |
| LRP2      | 3.287729979 | 1.04E-05 | 0.000107 |
| FOXG1     | 3.138979912 | 1.56E-05 | 0.000145 |
| KCNK2     | 3.129750013 | 1.14E-05 | 0.000115 |
| SEMA6D    | 3.123460054 | 7.48E-05 | 0.000480 |
| HOXB8     | 3.119760036 | 2.72E-06 | 0.000041 |
| HHIP      | 3.095679998 | 2.98E-06 | 0.000044 |
| ARHGAP20  | 3.095540047 | 5.46E-05 | 0.000375 |
| TRIM9     | 3.093889952 | 1.37E-04 | 0.000774 |
| HOXC11    | 3.046279907 | 1.59E-06 | 0.000028 |
| MKX       | 2.93001008  | 5.99E-05 | 0.000403 |
| POU4F1    | 2.858119965 | 1.18E-04 | 0.000685 |
| DLX2      | 2.754379988 | 6.00E-05 | 0.000403 |
| HOXB13    | 2.726490021 | 1.80E-05 | 0.000161 |
| IKZF3     | 2.64399004  | 6.18E-06 | 0.000074 |
| ANKRD20A3 | 2.6378901   | 3.86E-06 | 0.000053 |
| HOXC8     | 2.612240076 | 3.06E-06 | 0.000045 |
| ANKRD20A1 | 2.59671998  | 3.10E-06 | 0.000046 |
| ANKRD20A2 | 2.519579887 | 2.95E-05 | 0.000235 |
| LHX8      | 2.44265008  | 1.22E-05 | 0.000121 |
| SLC30A4   | 2.294430017 | 4.35E-07 | 0.000012 |
| COL25A1   | 2.293169975 | 2.53E-05 | 0.000208 |
| HOXD4     | 2.272140026 | 3.86E-05 | 0.000288 |
| MCOLN3    | 2.266340017 | 2.55E-06 | 0.000040 |
| SIX1      | 2.247240067 | 7.01E-07 | 0.000017 |
| EPB41L4A  | 2.236099958 | 1.05E-05 | 0.000108 |
| HOXB7     | 2.20152998  | 9.74E-06 | 0.000102 |
| TBX3      | 2.194560051 | 6.16E-05 | 0.000412 |
| DDAH1     | 2.128789902 | 1.53E-08 | 0.000002 |
| GLT25D2   | 2.082890034 | 9.52E-05 | 0.000580 |

|          |             |          |          |
|----------|-------------|----------|----------|
| TMEFF2   | 2.060280085 | 4.81E-06 | 0.000062 |
| ISL2     | 2.057070017 | 4.79E-06 | 0.000062 |
| KCNC4    | 2.040640116 | 1.36E-04 | 0.000770 |
| HOXD3    | 2.000669956 | 2.48E-04 | 0.001246 |
| NPR3     | 0.499175005 | 5.93E-06 | 0.000072 |
| IRX4     | 0.487553013 | 1.25E-04 | 0.000716 |
| MT1H     | 0.486813973 | 2.22E-04 | 0.001140 |
| BHLHE41  | 0.484253996 | 3.23E-04 | 0.001555 |
| TRADD    | 0.476679027 | 5.25E-07 | 0.000014 |
| LYSMD2   | 0.475443006 | 1.90E-05 | 0.000168 |
| ASCL2    | 0.469876006 | 1.03E-04 | 0.000615 |
| KCND3    | 0.469047984 | 2.42E-04 | 0.001223 |
| PMP22    | 0.456546985 | 3.17E-06 | 0.000046 |
| EFNA3    | 0.436899021 | 3.71E-06 | 0.000052 |
| GRIK3    | 0.43580698  | 1.11E-04 | 0.000656 |
| PLEC     | 0.425565005 | 2.58E-05 | 0.000212 |
| HSPA6    | 0.423699982 | 2.45E-04 | 0.001236 |
| PRKCE    | 0.415892981 | 1.52E-05 | 0.000143 |
| VDR      | 0.41469098  | 2.97E-06 | 0.000044 |
| ZFHX3    | 0.409849992 | 1.39E-06 | 0.000026 |
| KIAA1199 | 0.409172008 | 1.76E-05 | 0.000159 |
| MAPT     | 0.404388015 | 8.28E-05 | 0.000520 |
| CYP24A1  | 0.394723994 | 1.56E-05 | 0.000145 |
| C5orf39  | 0.390576993 | 1.73E-04 | 0.000936 |
| IRX3     | 0.389551996 | 2.80E-05 | 0.000226 |
| ABTB2    | 0.378941008 | 1.81E-08 | 0.000002 |
| TMOD2    | 0.378937002 | 2.27E-05 | 0.000192 |
| SYT12    | 0.378069008 | 4.83E-06 | 0.000062 |
| LMX1B    | 0.376172989 | 4.04E-06 | 0.000055 |
| B4GALNT1 | 0.366605002 | 8.79E-06 | 0.000095 |
| SUSD4    | 0.353246015 | 1.03E-06 | 0.000021 |
| CASZ1    | 0.351579996 | 7.27E-04 | 0.003043 |
| TBX2     | 0.331308998 | 1.99E-08 | 0.000002 |
| EGR3     | 0.321342006 | 1.10E-04 | 0.000649 |
| SCNN1G   | 0.315178992 | 4.80E-05 | 0.000340 |
| PKP1     | 0.309603989 | 3.66E-05 | 0.000276 |
| FLJ45983 | 0.303814999 | 1.32E-05 | 0.000128 |
| ALOX15   | 0.274848007 | 5.42E-07 | 0.000014 |
| EFNA1    | 0.270449993 | 1.30E-06 | 0.000025 |
| SHC4     | 0.261999998 | 3.43E-06 | 0.000049 |
| CAMK2N1  | 0.261129008 | 1.75E-07 | 0.000007 |
| BCL2     | 0.251323005 | 2.34E-07 | 0.000008 |

|          |             |          |          |
|----------|-------------|----------|----------|
| MYO5B    | 0.228716011 | 4.48E-07 | 0.000012 |
| NAV2     | 0.221318999 | 2.82E-07 | 0.000009 |
| DNAJC22  | 0.212828001 | 7.83E-07 | 0.000018 |
| CACNA1D  | 0.201434993 | 8.56E-08 | 0.000004 |
| CXCL16   | 0.190136002 | 1.38E-06 | 0.000026 |
| CTNND2   | 0.188282005 | 1.15E-08 | 0.000001 |
| EPAS1    | 0.183368005 | 1.59E-06 | 0.000028 |
| DUSP4    | 0.167091003 | 1.65E-07 | 0.000007 |
| NPY1R    | 0.166754    | 1.55E-08 | 0.000002 |
| LGALS3   | 0.163541996 | 2.00E-07 | 0.000007 |
| KLF4     | 0.14033     | 1.18E-05 | 0.000118 |
| SLC9A2   | 0.126631997 | 2.15E-08 | 0.000002 |
| NPNT     | 0.118996003 | 1.26E-10 | 0.000000 |
| PGR      | 0.088558901 | 4.94E-08 | 0.000003 |
| FBP1     | 0.068931601 | 3.50E-08 | 0.000002 |
| TMEM30B  | 0.063852999 | 3.71E-08 | 0.000002 |
| SIDT1    | 0.0506596   | 4.67E-09 | 0.000001 |
| GATA3    | 0.0387425   | 1.11E-08 | 0.000001 |
| DKK1     | 0.034603499 | 1.77E-08 | 0.000002 |
| KIAA1324 | 0.023831099 | 1.05E-08 | 0.000001 |

Supplementary Materials Table 8. Differential expression of the PRC2\_TARGETS genes in the gene expression arrays of MCF-7 and MCF-7-TNR cells (initially reported in Antoon JW, et al. Altered death receptor signaling promotes epithelial-to-mesenchymal transition and acquired chemoresistance. Sci Rep. 2012;2:539. PubMed PMID: 22844580).
