# Supplementary material
Source: PubMed Central journal article supplement (PMC4402121)
Supplement: NIHMS650981-supplement-i.pdf [file NIHMS650981-supplement-i.pdf]

| Gene   | Fold (MCF-7-TNR/MCF-7) | p-value  | FDR      |
|--------|------------------------|----------|----------|
| HOXA1  | 4.89                   | 5.01E-06 | 0.000064 |
| HOXA11 | 13.76                  | 9.90E-07 | 0.000021 |
| HOXA2  | 15.73                  | 6.95E-09 | 0.000001 |
| HOXA3  | 4.32                   | 5.91E-05 | 0.000398 |
| HOXA4  | 5.56                   | 8.25E-08 | 0.000004 |
| HOXA5  | 15.22                  | 1.47E-08 | 0.000002 |
| HOXA6  | 10.75                  | 8.55E-08 | 0.000004 |
| HOXA7  | 2.62                   | 4.19E-06 | 0.000056 |
| HOXA9  | 44.68                  | 5.67E-11 | 0.000000 |
| HOXB13 | 2.65                   | 1.80E-05 | 0.000161 |
| HOXB2  | 4.78                   | 6.32E-07 | 0.000016 |
| HOXB3  | 5.65                   | 3.26E-06 | 0.000047 |
| HOXB4  | 2.70                   | 2.40E-04 | 0.001214 |
| HOXB5  | 8.59                   | 2.40E-06 | 0.000038 |
| HOXB6  | 24.15                  | 1.27E-07 | 0.000006 |
| HOXB7  | 2.26                   | 9.74E-06 | 0.000102 |
| HOXB8  | 3.03                   | 2.72E-06 | 0.000041 |
| HOXB9  | 15.98                  | 1.01E-08 | 0.000001 |
| HOXC10 | 3.98                   | 1.15E-06 | 0.000023 |
| HOXC11 | 2.96                   | 1.59E-06 | 0.000028 |
| HOXC6  | 4.43                   | 2.94E-09 | 0.000001 |
| HOXC8  | 2.45                   | 3.06E-06 | 0.000045 |
| HOXC9  | 3.75                   | 2.51E-07 | 0.000008 |
| HOXD10 | 39.67                  | 1.08E-08 | 0.000001 |
| HOXD11 | 8.98                   | 7.67E-06 | 0.000087 |
| HOXD13 | 10.62                  | 5.79E-07 | 0.000015 |
| HOXD4  | 2.30                   | 3.86E-05 | 0.000288 |

Supplementary Materials Table 9. Differential expression of the HOX genes in the gene expression arrays of MCF-7 and MCF-7-TNR cells (initially reported in Antoon JW, et al. Altered death receptor signaling promotes epithelial-to-mesenchymal transition and acquired chemoresistance. *Sci Rep.* 2012;2:539. PubMed PMID: 22844580).
